# Supplementary material
Source: HighWire-hosted journal article supplement (https://bmjopen.bmj.com/content/12/10/e061092)
Supplement: inline-supplementary-material-1 [file inline-supplementary-material-1.pdf]

**Appendix A: Survey Photographs by Country**

|                                    | Casual                                                                              | Casual with white coat                                                              | Scrubs                                                                              | Scrubs with white coat                                                              | Formal                                                                               | Formal with white coat                                                                | Business suit                                                                         |
|------------------------------------|-------------------------------------------------------------------------------------|-------------------------------------------------------------------------------------|-------------------------------------------------------------------------------------|-------------------------------------------------------------------------------------|--------------------------------------------------------------------------------------|---------------------------------------------------------------------------------------|---------------------------------------------------------------------------------------|
| <b>Italy and the United States</b> |    |    |    |    |    |    |    |
|                                    |    |    |    |    |    |    |    |
| <b>Switzerland</b>                 |   |   |   |   |   |   |   |
|                                    |  |  |  |  |  |  |  |
| <b>Japan</b>                       |  |  |  |  |  |  |  |
|                                    |  |  |  |  |  |  |  |
