# Supplementary material
Source: HighWire-hosted journal article supplement (https://bmjopen.bmj.com/content/12/10/e061092)
Supplement: inline-supplementary-material-3 [file inline-supplementary-material-3.pdf]

## Appendix C. Composite ratings of physician attire by domain

| Attire                 | Domain        | Italy |      |     | Japan |      |     | Switzerland |      |     | United States |      |     |
|------------------------|---------------|-------|------|-----|-------|------|-----|-------------|------|-----|---------------|------|-----|
|                        |               | n     | Mean | SD  | n     | Mean | SD  | n           | Mean | SD  | n             | Mean | SD  |
| Casual                 | knowledgeable | 137   | 5.2  | 2.5 | 285   | 5.3  | 2.4 | 118         | 5.6  | 2.4 | 752           | 5.4  | 2.7 |
|                        | trustworthy   | 136   | 5.5  | 2.6 | 286   | 5.4  | 2.4 | 117         | 6.0  | 2.4 | 752           | 6.0  | 2.7 |
|                        | caring        | 134   | 6.2  | 2.4 | 286   | 6.2  | 2.3 | 119         | 6.4  | 2.4 | 751           | 6.4  | 2.6 |
|                        | approachable  | 137   | 6.7  | 2.3 | 286   | 6.5  | 2.3 | 119         | 7.1  | 2.2 | 752           | 6.7  | 2.6 |
|                        | comfort       | 138   | 6.4  | 2.8 | 286   | 5.8  | 2.4 | 117         | 6.4  | 2.4 | 754           | 6.3  | 2.8 |
|                        | mean score    | 133   | 6.0  | 2.3 | 285   | 5.8  | 2.2 | 115         | 6.3  | 2.2 | 748           | 6.2  | 2.5 |
| Casual with white coat | knowledgeable | 133   | 6.3  | 2.1 | 288   | 6.7  | 2.1 | 125         | 6.1  | 2.4 | 759           | 7.2  | 2.2 |
|                        | trustworthy   | 133   | 6.5  | 2.1 | 288   | 6.8  | 2.1 | 124         | 6.5  | 2.4 | 757           | 7.4  | 2.2 |
|                        | caring        | 133   | 7.1  | 2.0 | 288   | 7.3  | 1.9 | 122         | 6.6  | 2.5 | 759           | 7.5  | 2.1 |
|                        | approachable  | 133   | 7.4  | 1.9 | 288   | 7.5  | 1.9 | 124         | 7.1  | 2.4 | 764           | 7.7  | 2.1 |
|                        | comfort       | 133   | 7.2  | 2.0 | 288   | 7.1  | 2.1 | 123         | 6.5  | 2.5 | 759           | 7.5  | 2.2 |
|                        | mean score    | 133   | 6.9  | 1.8 | 288   | 7.1  | 1.8 | 121         | 6.6  | 2.3 | 747           | 7.4  | 2.0 |
| Scrubs                 | knowledgeable | 136   | 6.2  | 2.4 | 283   | 6.3  | 2.1 | 114         | 6.8  | 2.0 | 747           | 7.0  | 2.3 |
|                        | trustworthy   | 135   | 6.4  | 2.3 | 283   | 6.5  | 2.1 | 116         | 7.2  | 2.0 | 747           | 7.3  | 2.2 |
|                        | caring        | 134   | 6.9  | 2.2 | 283   | 7.0  | 1.9 | 115         | 7.0  | 2.0 | 746           | 7.5  | 2.1 |
|                        | approachable  | 136   | 7.2  | 2.1 | 283   | 7.2  | 1.8 | 115         | 7.4  | 1.7 | 749           | 7.7  | 2.1 |
|                        | comfort       | 136   | 7.1  | 2.4 | 283   | 6.8  | 2.0 | 114         | 7.1  | 2.1 | 749           | 7.5  | 2.3 |
|                        | mean score    | 134   | 6.8  | 2.1 | 283   | 6.8  | 1.8 | 113         | 7.1  | 1.7 | 742           | 7.4  | 2.0 |
| Scrubs with white coat | knowledgeable | 126   | 6.7  | 2.2 | 288   | 6.1  | 2.0 | 122         | 7.1  | 2.0 | 761           | 7.5  | 2.1 |
|                        | trustworthy   | 128   | 6.9  | 2.3 | 290   | 6.2  | 2.0 | 122         | 7.5  | 2.1 | 759           | 7.6  | 2.1 |
|                        | caring        | 126   | 7.1  | 2.3 | 290   | 6.8  | 2.0 | 121         | 7.4  | 2.0 | 757           | 7.6  | 2.1 |
|                        | approachable  | 127   | 7.4  | 2.0 | 290   | 7.2  | 2.0 | 120         | 7.8  | 1.9 | 761           | 7.8  | 2.1 |
|                        | comfort       | 128   | 7.3  | 2.2 | 290   | 6.6  | 2.1 | 121         | 7.5  | 1.9 | 760           | 7.7  | 2.2 |
|                        | mean score    | 125   | 7.1  | 2.0 | 288   | 6.6  | 1.8 | 120         | 7.5  | 1.7 | 753           | 7.6  | 2.0 |
| Formal                 | knowledgeable | 137   | 5.6  | 2.4 | 286   | 5.5  | 2.3 | 121         | 5.6  | 2.4 | 759           | 7.4  | 2.1 |
|                        | trustworthy   | 137   | 5.7  | 2.4 | 285   | 5.5  | 2.3 | 121         | 6.0  | 2.3 | 759           | 7.5  | 2.1 |

|                        |               |     |     |     |     |     |     |     |     |     |     |     |     |
|------------------------|---------------|-----|-----|-----|-----|-----|-----|-----|-----|-----|-----|-----|-----|
|                        | caring        | 136 | 6.1 | 2.5 | 286 | 6.1 | 2.1 | 119 | 5.8 | 2.6 | 756 | 7.5 | 2.1 |
|                        | approachable  | 137 | 6.5 | 2.3 | 286 | 6.3 | 2.2 | 121 | 6.0 | 2.6 | 763 | 7.7 | 2.1 |
|                        | comfort       | 137 | 6.1 | 2.5 | 286 | 5.8 | 2.3 | 121 | 5.7 | 2.5 | 761 | 7.5 | 2.2 |
|                        | mean score    | 136 | 6.0 | 2.2 | 285 | 5.9 | 2.1 | 119 | 5.8 | 2.3 | 754 | 7.5 | 2.0 |
| Formal with white coat | knowledgeable | 131 | 7.2 | 2.1 | 284 | 6.6 | 1.9 | 102 | 7.4 | 2.0 | 764 | 8.2 | 1.9 |
|                        | trustworthy   | 130 | 7.4 | 2.0 | 284 | 6.7 | 1.9 | 101 | 7.4 | 2.0 | 761 | 8.2 | 1.9 |
|                        | caring        | 131 | 7.6 | 1.9 | 284 | 7.4 | 1.7 | 101 | 7.1 | 2.1 | 759 | 8.0 | 1.9 |
|                        | approachable  | 131 | 7.8 | 1.8 | 284 | 7.4 | 1.8 | 102 | 7.2 | 2.1 | 758 | 8.1 | 1.9 |
|                        | comfort       | 130 | 7.7 | 1.8 | 284 | 7.0 | 1.8 | 101 | 7.0 | 2.3 | 758 | 8.1 | 2.0 |
|                        | mean score    | 130 | 7.5 | 1.8 | 284 | 7.0 | 1.6 | 101 | 7.2 | 1.9 | 754 | 8.1 | 1.8 |
| Business suit          | knowledgeable | 131 | 5.5 | 2.6 | 295 | 5.3 | 2.2 | 110 | 5.2 | 2.5 | 755 | 7.4 | 2.3 |
|                        | trustworthy   | 129 | 5.7 | 2.5 | 295 | 5.4 | 2.2 | 109 | 5.4 | 2.5 | 755 | 7.3 | 2.3 |
|                        | caring        | 130 | 5.6 | 2.5 | 296 | 5.8 | 2.2 | 110 | 5.0 | 2.4 | 754 | 7.1 | 2.4 |
|                        | approachable  | 128 | 5.8 | 2.6 | 296 | 5.8 | 2.3 | 110 | 5.4 | 2.5 | 753 | 7.2 | 2.4 |
|                        | comfort       | 131 | 5.5 | 2.8 | 295 | 5.4 | 2.3 | 109 | 5.2 | 2.5 | 755 | 7.0 | 2.5 |
|                        | mean score    | 128 | 5.6 | 2.4 | 295 | 5.5 | 2.1 | 108 | 5.2 | 2.2 | 751 | 7.2 | 2.2 |

### Appendix D. Comparisons of patient preferences for physician attire by type of attire between countries

| Location Comparison | Casual          |                                    |     | Casual + White Coat |                                    |     | Scrubs          |                                    |     | Scrubs + White Coat |                                    |     | Formal          |                                    |     | Formal + White Coat |                                    |     | Suit            |                                    |     |
|---------------------|-----------------|------------------------------------|-----|---------------------|------------------------------------|-----|-----------------|------------------------------------|-----|---------------------|------------------------------------|-----|-----------------|------------------------------------|-----|---------------------|------------------------------------|-----|-----------------|------------------------------------|-----|
|                     | Mean difference | Simultaneous 95% confidence limits | sig | Mean difference     | Simultaneous 95% confidence limits | sig | Mean difference | Simultaneous 95% confidence limits | sig | Mean difference     | Simultaneous 95% confidence limits | sig | Mean difference | Simultaneous 95% confidence limits | sig | Mean difference     | Simultaneous 95% confidence limits | sig | Mean difference | Simultaneous 95% confidence limits | sig |
| Italy-Japan         | 0.2049          | -0.4354 0.8452                     |     | -0.1829             | -0.714 0.3481                      |     | 0.0028          | -0.5287 0.5343                     |     | 0.46551             | -0.0631 0.99412                    |     | 0.1275          | -0.4215 0.6765                     |     | 0.53538             | 0.05998 1.01079                    | *** | 0.101           | -0.4955 0.6975                     |     |
| Italy-US            | -0.1454         | -0.7192 0.4284                     |     | -0.5303             | -1.007 -0.0535                     | *** | -0.6422         | -1.118 -0.1665                     | *** | -0.58969            | -1.06635 -0.11303                  | *** | -1.553          | -2.0438 -1.0622                    | *** | -0.57297            | -0.99952 -0.14662                  | *** | -1.5514         | -2.0903 -1.0125                    | *** |
| Italy-Swiss         | -0.3137         | -1.0902 0.4627                     |     | 0.3128              | -0.3236 0.9492                     |     | -0.3083         | -0.9557 0.3391                     |     | -0.43477            | -1.06551 0.19596                   |     | 0.1381          | -0.5231 0.7994                     |     | 0.3136              | -0.28188 0.90908                   |     | 0.4027          | -0.3337 1.139                      |     |
| Japan-US            | -0.3503         | -0.7748 0.0742                     |     | -0.3473             | -0.6987 0.004                      |     | -0.645          | -0.9992 -0.2909                    | *** | -1.0552             | -1.39714 -0.71326                  | *** | -1.6805         | -2.0468 -1.3142                    | *** | -1.10836            | -1.42093 -0.79579                  | *** | -1.6523         | -2.0396 -1.2651                    | *** |
| Japan-Swiss         | -0.5186         | -1.1923 0.155                      |     | 0.4957              | -0.0531 1.0445                     |     | -0.3111         | -0.8751 0.253                      |     | -0.90028            | -1.43652 -0.36404                  | *** | 0.0106          | -0.5643 0.5856                     |     | -0.22178            | -0.7419 0.29834                    |     | 0.3017          | -0.3321 0.9355                     |     |
| US-Swiss            | -0.1683         | -0.7791 0.4424                     |     | 0.843               | 0.3466 1.3394                      | *** | 0.3339          | -0.1779 0.8458                     |     | 0.15492             | -0.33018 0.64003                   |     | 1.6911          | 1.1715 2.2108                      | *** | 0.88657             | 0.41088 1.36227                    | *** | 1.954           | 1.3741 2.534                       | *** |

Sig, \*\*\*: Statistically significant

## Appendix E. Comparisons of respondent opinions regarding importance, influence, and appropriateness of physician attire and white coats between countries

| Location Comparison | Important       |                                    |     | Influence       |                                    |     | Casual weekend  |                                    |     | White coat office |                                    |     | White coat ER   |                                    |     | White coat hospital |                                    |     | White coat any setting |                                    |     |
|---------------------|-----------------|------------------------------------|-----|-----------------|------------------------------------|-----|-----------------|------------------------------------|-----|-------------------|------------------------------------|-----|-----------------|------------------------------------|-----|---------------------|------------------------------------|-----|------------------------|------------------------------------|-----|
|                     | Mean difference | Simultaneous 95% confidence limits | sig | Mean difference | Simultaneous 95% confidence limits | sig | Mean difference | Simultaneous 95% confidence limits | sig | Mean difference   | Simultaneous 95% confidence limits | sig | Mean difference | Simultaneous 95% confidence limits | sig | Mean difference     | Simultaneous 95% confidence limits | sig | Mean difference        | Simultaneous 95% confidence limits | sig |
| Italy-Japan         | 0.03935         | -0.06317 0.14187                   |     | -0.29709        | -0.40417 -0.19002                  | *** | 0.57316         | 0.46985 0.67648                    | *** | 0.33013           | 0.23509 0.42516                    | *** | 1.01157         | 0.91526 1.10788                    | *** | 0.599               | 0.51144 0.68657                    | *** | 0.57579                | 0.47487 0.67671                    | *** |
| Italy-US            | 0.05486         | -0.03705 0.14677                   |     | -0.24249        | -0.33851 -0.14646                  | *** | -0.12125        | -0.21387 -0.02864                  | *** | 0.38806           | 0.30286 0.47326                    | *** | 0.72743         | 0.64117 0.81369                    | *** | 0.53173             | 0.45328 0.61019                    | *** | 0.43908                | 0.34865 0.52952                    | *** |
| Italy-Swiss         | 0.49847         | 0.37459 0.62235                    | *** | 0.44933         | 0.32 0.57867                       | *** | -0.22814        | -0.35336 -0.10292                  | *** | 0.65738           | 0.5425 0.77226                     | *** | 0.04456         | -0.072 0.16113                     |     | 0.27093             | 0.16489 0.37697                    | *** | 0.73863                | 0.61654 0.86072                    | *** |
| Japan-US            | 0.01551         | -0.05221 0.08323                   |     | 0.05461         | -0.01601 0.12522                   |     | -0.69442        | -0.76271 -0.62613                  | *** | 0.05793           | -0.00488 0.12075                   |     | -0.28414        | -0.34798 -0.22031                  | *** | -0.06727            | -0.12529 -0.00925                  | *** | -0.1367                | -0.20354 -0.06986                  | *** |
| Japan-Swiss         | 0.45912         | 0.35195 0.56629                    | *** | 0.74643         | 0.63466 0.8582                     | *** | -0.8013         | -0.90977 -0.69283                  | *** | 0.32726           | 0.22784 0.42667                    | *** | -0.96701        | -1.06811 -0.8659                   | *** | -0.32808            | -0.42003 -0.23612                  | *** | 0.16284                | 0.05703 0.26865                    | *** |
| US-Swiss            | 0.44361         | 0.34655 0.54067                    | *** | 0.69182         | 0.59059 0.79306                    | *** | -0.10689        | -0.20522 -0.00856                  | *** | 0.26933           | 0.17926 0.35939                    | *** | -0.68287        | -0.77444 -0.59129                  | *** | -0.26081            | -0.34414 -0.17748                  | *** | 0.29954                | 0.20369 0.3954                     | *** |

Sig, \*\*\*: Statistically significant

Important: How my doctor dresses is important to me.

Influence: How my doctor dresses influences how happy I am with the care I receive.

Casual weekend: It is appropriate for a doctor to dress casually when seeing patients over the weekend.

White coat office: Doctors should wear a white coat when seeing patients in their office.

White coat ER: Doctors should wear a white coat when seeing patients in the emergency room.

White coat hospital: Doctors should wear a white coat when seeing patients in the hospital.

White coat any setting: Doctors should always wear a white coat when seeing patients in any setting.

**Appendix F. Composite scores by respondent gender**

| Attire                 | Italy |        |      | Japan |        |      | Switzerland |        |       | United States |        |      |
|------------------------|-------|--------|------|-------|--------|------|-------------|--------|-------|---------------|--------|------|
|                        | Male  | Female | P    | Male  | Female | P    | Male        | Female | P     | Male          | Female | P    |
| Casual                 | 6.0   | 6.1    | 0.77 | 6.0   | 5.6    | 0.13 | 6.5         | 6.0    | 0.21  | 6.3           | 6.0    | 0.10 |
| Casual with white coat | 7.0   | 6.9    | 0.85 | 7.2   | 7.0    | 0.40 | 6.5         | 6.6    | 0.90  | 7.3           | 7.5    | 0.16 |
| Scrubs                 | 6.5   | 6.9    | 0.34 | 6.8   | 6.8    | 0.93 | 7.2         | 6.9    | 0.38  | 7.4           | 7.5    | 0.71 |
| Scrubs with white coat | 7.3   | 6.9    | 0.26 | 6.5   | 6.6    | 0.60 | 7.5         | 7.5    | 0.96  | 7.6           | 7.7    | 0.41 |
| Formal                 | 5.6   | 6.3    | 0.09 | 6.0   | 5.7    | 0.28 | 6.2         | 5.4    | 0.04* | 7.6           | 7.4    | 0.23 |
| Formal with white coat | 7.5   | 7.6    | 0.73 | 7.0   | 7.0    | 0.77 | 7.3         | 7.1    | 0.55  | 8.1           | 8.1    | 0.94 |
| Business suit          | 5.5   | 5.8    | 0.52 | 5.6   | 5.4    | 0.41 | 5.1         | 5.2    | 0.74  | 7.1           | 7.3    | 0.38 |

\* Statistically significant

**Appendix G. Composite scores by respondent age**

| Attire                 | Italy       |       |       |       |     |      | Japan         |       |       |       |     |         |
|------------------------|-------------|-------|-------|-------|-----|------|---------------|-------|-------|-------|-----|---------|
|                        | 18-25       | 26-34 | 35-54 | 55-64 | 65+ | P    | 18-25         | 26-34 | 35-54 | 55-64 | 65+ | P       |
| Casual                 | 4.8         | 5.6   | 6.1   | 6.4   | 6.2 | 0.40 | 5.4           | 4.6   | 5.2   | 5.4   | 6.3 | 0.001*  |
| Casual with white coat | 8.1         | 6.5   | 6.4   | 7.1   | 7.0 | 0.06 | 8.0           | 7.0   | 6.6   | 6.7   | 7.4 | 0.003*  |
| Scrubs                 | 6.4         | 7.6   | 6.5   | 7.0   | 6.7 | 0.63 | 6.0           | 5.9   | 6.6   | 6.6   | 7.0 | 0.07    |
| Scrubs with white coat | 7.5         | 7.4   | 6.4   | 7.3   | 7.5 | 0.12 | 7.3           | 6.9   | 6.3   | 6.4   | 6.7 | 0.37    |
| Formal                 | 5.7         | 6.3   | 5.8   | 6.0   | 6.0 | 0.95 | 6.1           | 5.1   | 5.3   | 5.5   | 6.4 | 0.002*  |
| Formal with white coat | 7.9         | 7.3   | 7.6   | 7.3   | 7.7 | 0.76 | 7.5           | 6.6   | 6.6   | 6.8   | 7.3 | 0.01*   |
| Business suit          | 4.7         | 7.1   | 5.7   | 5.3   | 5.4 | 0.12 | 5.0           | 4.8   | 5.0   | 5.2   | 6.1 | <0.001* |
|                        | Switzerland |       |       |       |     |      | United States |       |       |       |     |         |
|                        | 18-25       | 26-34 | 35-54 | 55-64 | 65+ | P    | 18-25         | 26-34 | 35-54 | 55-64 | 65+ | P       |
| Casual                 | 7.7         | 6.6   | 6.3   | 6.4   | 5.9 | 0.72 | 5.9           | 6.3   | 5.8   | 6.1   | 6.5 | 0.09    |
| Casual with white coat | 7.2         | 7.5   | 6.6   | 6.1   | 6.2 | 0.27 | 8.0           | 7.6   | 7.2   | 7.3   | 7.6 | 0.03*   |
| Scrubs                 | 7.3         | 6.4   | 6.9   | 7.5   | 7.5 | 0.35 | 8.1           | 7.9   | 7.2   | 7.2   | 7.6 | 0.01*   |
| Scrubs with white coat | 8.5         | 7.8   | 7.1   | 7.5   | 8.0 | 0.10 | 7.9           | 7.7   | 7.7   | 7.5   | 7.7 | 0.73    |

|                        |     |     |     |     |     |      |     |     |     |     |     |        |
|------------------------|-----|-----|-----|-----|-----|------|-----|-----|-----|-----|-----|--------|
| Formal                 | 5.9 | 5.2 | 5.8 | 6.3 | 5.8 | 0.52 | 8.3 | 7.5 | 7.2 | 7.5 | 7.8 | 0.003* |
| Formal with white coat | 6.8 | 6.1 | 7.3 | 7.9 | 6.9 | 0.20 | 8.2 | 7.8 | 8.0 | 8.1 | 8.3 | 0.15   |
| Business suit          | 5.8 | 4.4 | 5.2 | 5.4 | 5.4 | 0.69 | 7.1 | 7.2 | 7.0 | 7.1 | 7.4 | 0.28   |

\* Statistically significant
